# Supplementary material
Source: publisher figshare collection journal article supplement (https://brill.figshare.com/ndownloader/files/9253435)
Supplement: Supplementary file 1 [file 9253435]

## Sheet: Sheet1
Term	Database	Id	Sample number	Background number	p-value	Corrected p-value	Genes	Hyperlink
Biosynthesis of unsaturated fatty acids	KEGG PATHWAY	ko01040	8	76	0.000117425	0.020901735	c22816_g1, c21551_g1, c19549_g1, c21108_g1, c21838_g1, c22357_g1, c21467_g1, c23468_g1	http://www.genome.jp/kegg-bin/show_pathway?ko01040
Metabolism of xenobiotics by cytochrome P450	KEGG PATHWAY	ko00980	6	64	0.001548645	0.137829408	c22883_g1, c23238_g1, c22883_g2, c20828_g1, c3262_g1, c22737_g1	http://www.genome.jp/kegg-bin/show_pathway?ko00980
Fatty acid metabolism	KEGG PATHWAY	ko01212	10	193	0.004808378	0.285297105	c22816_g1, c21551_g1, c19549_g1, c21108_g1, c21880_g1, c21838_g1, c22357_g1, c21467_g1, c21604_g1, c23468_g1	http://www.genome.jp/kegg-bin/show_pathway?ko01212
Drug metabolism - cytochrome P450	KEGG PATHWAY	ko00982	5	65	0.008805177	0.391830386	c20828_g1, c22737_g1, c3262_g1, c22883_g1, c22883_g2	http://www.genome.jp/kegg-bin/show_pathway?ko00982
Hippo signaling pathway - fly	KEGG PATHWAY	ko04391	5	90	0.031684556	0.908322918	c19566_g4, c21163_g1, c19566_g1, c22747_g2, c21573_g1	http://www.genome.jp/kegg-bin/show_pathway?ko04391
Valine, leucine and isoleucine degradation	KEGG PATHWAY	ko00280	7	160	0.0381109	0.908322918	c23400_g1, c20884_g1, c21108_g1, c23405_g1, c21880_g1, c21838_g1, c21604_g1	http://www.genome.jp/kegg-bin/show_pathway?ko00280
Glycolysis / Gluconeogenesis	KEGG PATHWAY	ko00010	10	275	0.044710334	0.908322918	c23704_g1, c25710_g1, c23751_g1, c22883_g1, c22883_g2, c20317_g1, c3262_g1, c23005_g1, c24608_g1, c22737_g1	http://www.genome.jp/kegg-bin/show_pathway?ko00010
Adherens junction	KEGG PATHWAY	ko04520	5	102	0.049871973	0.908322918	c19566_g4, c21573_g1, c19566_g1, c22747_g2, c20055_g1	http://www.genome.jp/kegg-bin/show_pathway?ko04520
Histidine metabolism	KEGG PATHWAY	ko00340	3	44	0.05447878	0.908322918	c25356_g1, c22883_g1, c22883_g2	http://www.genome.jp/kegg-bin/show_pathway?ko00340
Nitrogen metabolism	KEGG PATHWAY	ko00910	4	75	0.059267406	0.908322918	c17400_g1, c24852_g1, c27060_g1, c20300_g1	http://www.genome.jp/kegg-bin/show_pathway?ko00910
Retinol metabolism	KEGG PATHWAY	ko00830	3	46	0.06071379	0.908322918	c22737_g1, c3262_g1, c23602_g2	http://www.genome.jp/kegg-bin/show_pathway?ko00830
Biosynthesis of secondary metabolites	KEGG PATHWAY	ko01110	30	1141	0.061235253	0.908322918	c25050_g1, c22258_g1, c23400_g1, c25827_g1, c25253_g1, c25253_g2, c23704_g1, c22926_g1, c23301_g1, c21108_g1, c3262_g1, c21880_g1, c23751_g1, c24608_g1, c22737_g1, c25322_g1, c23005_g1, c23018_g1, c21769_g1, c25710_g1, c21551_g1, c21838_g1, c21604_g1, c24177_g1, c25013_g1, c22808_g1, c20317_g1, c23405_g1, c22893_g1, c22936_g1	http://www.genome.jp/kegg-bin/show_pathway?ko01110
Focal adhesion	KEGG PATHWAY	ko04510	7	182	0.067004829	0.917450737	c19566_g4, c21840_g1, c19566_g1, c22747_g2, c39084_g1, c21573_g1, c20055_g1	http://www.genome.jp/kegg-bin/show_pathway?ko04510
Regulation of actin cytoskeleton	KEGG PATHWAY	ko04810	7	193	0.085340515	0.984204927	c19566_g4, c19566_g1, c22747_g2, c39084_g1, c21573_g1, c20055_g1, c23030_g1	http://www.genome.jp/kegg-bin/show_pathway?ko04810
Hippo signaling pathway	KEGG PATHWAY	ko04390	5	123	0.093804264	0.984204927	c19566_g4, c21163_g1, c19566_g1, c22747_g2, c21573_g1	http://www.genome.jp/kegg-bin/show_pathway?ko04390
Tyrosine metabolism	KEGG PATHWAY	ko00350	4	88	0.093869046	0.984204927	c22737_g1, c3262_g1, c22883_g1, c22883_g2	http://www.genome.jp/kegg-bin/show_pathway?ko00350
Sesquiterpenoid and triterpenoid biosynthesis	KEGG PATHWAY	ko00909	1	5	0.0939971	0.984204927	c23301_g1	http://www.genome.jp/kegg-bin/show_pathway?ko00909
Tight junction	KEGG PATHWAY	ko04530	6	163	0.100974072	0.998521381	c39084_g1, c19566_g1, c22747_g2, c19566_g4, c21573_g1, c20055_g1	http://www.genome.jp/kegg-bin/show_pathway?ko04530
Lysosome	KEGG PATHWAY	ko04142	7	215	0.129688452	1	c6643_g1, c15288_g1, c26197_g1, c22001_g1, c26628_g1, c1992_g1, c13329_g1	http://www.genome.jp/kegg-bin/show_pathway?ko04142
Naphthalene degradation	KEGG PATHWAY	ko00626	2	33	0.135635648	1	c22737_g1, c3262_g1	http://www.genome.jp/kegg-bin/show_pathway?ko00626
Glyoxylate and dicarboxylate metabolism	KEGG PATHWAY	ko00630	5	139	0.137053742	1	c25253_g1, c22808_g1, c25322_g1, c25253_g2, c20300_g1	http://www.genome.jp/kegg-bin/show_pathway?ko00630
Peroxisome	KEGG PATHWAY	ko04146	6	180	0.141985738	1	c25253_g1, c19212_g1, c25253_g2, c21108_g1, c21585_g1, c21838_g1	http://www.genome.jp/kegg-bin/show_pathway?ko04146
alpha-Linolenic acid metabolism	KEGG PATHWAY	ko00592	2	34	0.142340911	1	c21108_g1, c21838_g1	http://www.genome.jp/kegg-bin/show_pathway?ko00592
Fatty acid degradation	KEGG PATHWAY	ko00071	6	183	0.149922318	1	c21108_g1, c3262_g1, c21880_g1, c21838_g1, c22737_g1, c21604_g1	http://www.genome.jp/kegg-bin/show_pathway?ko00071
Degradation of aromatic compounds	KEGG PATHWAY	ko01220	2	41	0.190918247	1	c22737_g1, c3262_g1	http://www.genome.jp/kegg-bin/show_pathway?ko01220
Geraniol degradation	KEGG PATHWAY	ko00281	1	11	0.195231409	1	c21880_g1	http://www.genome.jp/kegg-bin/show_pathway?ko00281
Arginine and proline metabolism	KEGG PATHWAY	ko00330	5	161	0.207917636	1	c19517_g1, c25013_g1, c24852_g1, c26401_g2, c20300_g1	http://www.genome.jp/kegg-bin/show_pathway?ko00330
Fatty acid elongation	KEGG PATHWAY	ko00062	2	44	0.212361013	1	c21551_g1, c21880_g1	http://www.genome.jp/kegg-bin/show_pathway?ko00062
Benzoate degradation	KEGG PATHWAY	ko00362	2	45	0.219561245	1	c21108_g1, c21838_g1	http://www.genome.jp/kegg-bin/show_pathway?ko00362
D-Glutamine and D-glutamate metabolism	KEGG PATHWAY	ko00471	1	13	0.226403051	1	c24852_g1	http://www.genome.jp/kegg-bin/show_pathway?ko00471
Microbial metabolism in diverse environments	KEGG PATHWAY	ko01120	17	717	0.240517896	1	c25710_g1, c20300_g1, c22808_g1, c23751_g1, c22883_g1, c19367_g1, c22883_g2, c24608_g1, c21108_g1, c20317_g1, c3262_g1, c22893_g1, c21880_g1, c23005_g1, c21838_g1, c22737_g1, c25322_g1	http://www.genome.jp/kegg-bin/show_pathway?ko01120
Chloroalkane and chloroalkene degradation	KEGG PATHWAY	ko00625	2	49	0.248528621	1	c22737_g1, c3262_g1	http://www.genome.jp/kegg-bin/show_pathway?ko00625
Phagosome	KEGG PATHWAY	ko04145	7	262	0.253571293	1	c19566_g4, c19566_g1, c22747_g2, c21573_g1, c24537_g1, c23404_g1, c15972_g1	http://www.genome.jp/kegg-bin/show_pathway?ko04145
beta-Alanine metabolism	KEGG PATHWAY	ko00410	3	91	0.262960997	1	c22883_g1, c21604_g1, c22883_g2	http://www.genome.jp/kegg-bin/show_pathway?ko00410
Biotin metabolism	KEGG PATHWAY	ko00780	1	16	0.270916715	1	c19549_g1	http://www.genome.jp/kegg-bin/show_pathway?ko00780
Other glycan degradation	KEGG PATHWAY	ko00511	1	17	0.285179358	1	c26628_g1	http://www.genome.jp/kegg-bin/show_pathway?ko00511
Meiosis - yeast	KEGG PATHWAY	ko04113	3	100	0.310890042	1	c24683_g1, c15359_g1, c21421_g1	http://www.genome.jp/kegg-bin/show_pathway?ko04113
Caprolactam degradation	KEGG PATHWAY	ko00930	1	19	0.312875091	1	c21880_g1	http://www.genome.jp/kegg-bin/show_pathway?ko00930
Folate biosynthesis	KEGG PATHWAY	ko00790	1	19	0.312875091	1	c20511_g1	http://www.genome.jp/kegg-bin/show_pathway?ko00790
Porphyrin and chlorophyll metabolism	KEGG PATHWAY	ko00860	2	59	0.321037321	1	c23956_g1, c21769_g1	http://www.genome.jp/kegg-bin/show_pathway?ko00860
Glycine, serine and threonine metabolism	KEGG PATHWAY	ko00260	3	103	0.32695735	1	c23956_g1, c22813_g1, c22893_g1	http://www.genome.jp/kegg-bin/show_pathway?ko00260
Valine, leucine and isoleucine biosynthesis	KEGG PATHWAY	ko00290	1	21	0.339500352	1	c23405_g1	http://www.genome.jp/kegg-bin/show_pathway?ko00290
Phenylalanine metabolism	KEGG PATHWAY	ko00360	2	62	0.342530284	1	c22883_g1, c22883_g2	http://www.genome.jp/kegg-bin/show_pathway?ko00360
Tryptophan metabolism	KEGG PATHWAY	ko00380	3	106	0.343020812	1	c25253_g1, c25253_g2, c21880_g1	http://www.genome.jp/kegg-bin/show_pathway?ko00380
Galactose metabolism	KEGG PATHWAY	ko00052	2	64	0.356739493	1	c25710_g1, c25050_g1	http://www.genome.jp/kegg-bin/show_pathway?ko00052
Carbon fixation in photosynthetic organisms	KEGG PATHWAY	ko00710	4	157	0.368384762	1	c24608_g1, c22808_g1, c23751_g1, c23005_g1	http://www.genome.jp/kegg-bin/show_pathway?ko00710
Synthesis and degradation of ketone bodies	KEGG PATHWAY	ko00072	1	24	0.377520958	1	c23400_g1	http://www.genome.jp/kegg-bin/show_pathway?ko00072
Biosynthesis of amino acids	KEGG PATHWAY	ko01230	9	416	0.426147042	1	c25710_g1, c20300_g1, c22813_g1, c22258_g1, c23405_g1, c22893_g1, c23005_g1, c24608_g1, c25322_g1	http://www.genome.jp/kegg-bin/show_pathway?ko01230
HIF-1 signaling pathway	KEGG PATHWAY	ko04066	3	122	0.427581298	1	c24608_g1, c21364_g2, c24537_g1	http://www.genome.jp/kegg-bin/show_pathway?ko04066
One carbon pool by folate	KEGG PATHWAY	ko00670	1	32	0.468571332	1	c25838_g1	http://www.genome.jp/kegg-bin/show_pathway?ko00670
Citrate cycle (TCA cycle)	KEGG PATHWAY	ko00020	5	231	0.472314995	1	c25322_g1, c22808_g1, c20317_g1, c22936_g1, c23751_g1	http://www.genome.jp/kegg-bin/show_pathway?ko00020
Notch signaling pathway	KEGG PATHWAY	ko04330	1	33	0.478975572	1	c26955_g1	http://www.genome.jp/kegg-bin/show_pathway?ko04330
Alanine, aspartate and glutamate metabolism	KEGG PATHWAY	ko00250	3	134	0.488433684	1	c24852_g1, c24177_g1, c20300_g1	http://www.genome.jp/kegg-bin/show_pathway?ko00250
Arachidonic acid metabolism	KEGG PATHWAY	ko00590	1	34	0.489176623	1	c25090_g1	http://www.genome.jp/kegg-bin/show_pathway?ko00590
Pantothenate and CoA biosynthesis	KEGG PATHWAY	ko00770	1	35	0.499178441	1	c23405_g1	http://www.genome.jp/kegg-bin/show_pathway?ko00770
Selenocompound metabolism	KEGG PATHWAY	ko00450	1	36	0.50898491	1	c22813_g1	http://www.genome.jp/kegg-bin/show_pathway?ko00450
Two-component system	KEGG PATHWAY	ko02020	2	87	0.509544092	1	c31181_g1, c20300_g1	http://www.genome.jp/kegg-bin/show_pathway?ko02020
Butanoate metabolism	KEGG PATHWAY	ko00650	2	89	0.521696543	1	c23400_g1, c21880_g1	http://www.genome.jp/kegg-bin/show_pathway?ko00650
Glutathione metabolism	KEGG PATHWAY	ko00480	2	92	0.5395436	1	c20828_g1, c25013_g1	http://www.genome.jp/kegg-bin/show_pathway?ko00480
Pyruvate metabolism	KEGG PATHWAY	ko00620	4	200	0.551315402	1	c22808_g1, c20317_g1, c22122_g1, c23751_g1	http://www.genome.jp/kegg-bin/show_pathway?ko00620
mRNA surveillance pathway	KEGG PATHWAY	ko03015	3	151	0.568818305	1	c15214_g1, c18353_g1, c21421_g1	http://www.genome.jp/kegg-bin/show_pathway?ko03015
Fatty acid biosynthesis	KEGG PATHWAY	ko00061	1	43	0.572470959	1	c19549_g1	http://www.genome.jp/kegg-bin/show_pathway?ko00061
MAPK signaling pathway - yeast	KEGG PATHWAY	ko04011	1	45	0.589056617	1	c20055_g1	http://www.genome.jp/kegg-bin/show_pathway?ko04011
Lysine degradation	KEGG PATHWAY	ko00310	2	104	0.606236516	1	c25827_g1, c21880_g1	http://www.genome.jp/kegg-bin/show_pathway?ko00310
Amino sugar and nucleotide sugar metabolism	KEGG PATHWAY	ko00520	3	163	0.620653669	1	c24177_g1, c22926_g1, c25050_g1	http://www.genome.jp/kegg-bin/show_pathway?ko00520
Terpenoid backbone biosynthesis	KEGG PATHWAY	ko00900	1	50	0.627766526	1	c23400_g1	http://www.genome.jp/kegg-bin/show_pathway?ko00900
Fructose and mannose metabolism	KEGG PATHWAY	ko00051	2	109	0.631783966	1	c25710_g1, c22926_g1	http://www.genome.jp/kegg-bin/show_pathway?ko00051
ABC transporters	KEGG PATHWAY	ko02010	1	52	0.642211976	1	c26330_g1	http://www.genome.jp/kegg-bin/show_pathway?ko02010
Pentose phosphate pathway	KEGG PATHWAY	ko00030	2	112	0.64648268	1	c20539_g1, c25710_g1	http://www.genome.jp/kegg-bin/show_pathway?ko00030
Metabolic pathways	KEGG PATHWAY	ko01100	49	2619	0.652537911	1	c23406_g1, c25050_g1, c26401_g2, c20511_g1, c23956_g1, c22258_g1, c42901_g1, c23400_g1, c25827_g1, c25090_g1, c23704_g1, c20300_g1, c24852_g1, c23301_g1, c22883_g1, c25838_g1, c22883_g2, c21108_g1, c3262_g1, c21880_g1, c23005_g1, c21838_g1, c22737_g1, c25322_g1, c23018_g1, c21769_g1, c25710_g1, c47020_g1, c23751_g1, c22813_g1, c19549_g1, c31140_g1, c24608_g1, c21629_g1, c21604_g1, c19631_g1, c195…	http://www.genome.jp/kegg-bin/show_pathway?ko01100
Steroid biosynthesis	KEGG PATHWAY	ko00100	1	54	0.656098191	1	c19631_g1	http://www.genome.jp/kegg-bin/show_pathway?ko00100
Pentose and glucuronate interconversions	KEGG PATHWAY	ko00040	1	56	0.669446769	1	c25050_g1	http://www.genome.jp/kegg-bin/show_pathway?ko00040
Sphingolipid metabolism	KEGG PATHWAY	ko00600	1	60	0.694613275	1	c21629_g1	http://www.genome.jp/kegg-bin/show_pathway?ko00600
Cysteine and methionine metabolism	KEGG PATHWAY	ko00270	2	123	0.696417515	1	c22258_g1, c22813_g1	http://www.genome.jp/kegg-bin/show_pathway?ko00270
Gap junction	KEGG PATHWAY	ko04540	2	123	0.696417515	1	c23404_g1, c15972_g1	http://www.genome.jp/kegg-bin/show_pathway?ko04540
2-Oxocarboxylic acid metabolism	KEGG PATHWAY	ko01210	2	125	0.704843812	1	c25322_g1, c23405_g1	http://www.genome.jp/kegg-bin/show_pathway?ko01210
Oxidative phosphorylation	KEGG PATHWAY	ko00190	8	482	0.728733917	1	c23406_g1, c47020_g1, c44009_g1, c25375_g1, c42901_g1, c31140_g1, c22936_g1, c31181_g1	http://www.genome.jp/kegg-bin/show_pathway?ko00190
MAPK signaling pathway	KEGG PATHWAY	ko04010	3	198	0.746573811	1	c25950_g1, c21840_g1, c16478_g1	http://www.genome.jp/kegg-bin/show_pathway?ko04010
Calcium signaling pathway	KEGG PATHWAY	ko04020	2	139	0.758501221	1	c24634_g2, c24634_g1	http://www.genome.jp/kegg-bin/show_pathway?ko04020
mTOR signaling pathway	KEGG PATHWAY	ko04150	1	73	0.763935226	1	c21364_g2	http://www.genome.jp/kegg-bin/show_pathway?ko04150
Endocytosis	KEGG PATHWAY	ko04144	3	209	0.778521984	1	c25950_g1, c20055_g1, c16478_g1	http://www.genome.jp/kegg-bin/show_pathway?ko04144
Ras signaling pathway	KEGG PATHWAY	ko04014	2	152	0.800571985	1	c20055_g1, c21840_g1	http://www.genome.jp/kegg-bin/show_pathway?ko04014
TGF-beta signaling pathway	KEGG PATHWAY	ko04350	1	82	0.802496159	1	c20055_g1	http://www.genome.jp/kegg-bin/show_pathway?ko04350
PI3K-Akt signaling pathway	KEGG PATHWAY	ko04151	3	238	0.847121181	1	c21163_g1, c21364_g2, c21421_g1	http://www.genome.jp/kegg-bin/show_pathway?ko04151
Carbon fixation pathways in prokaryotes	KEGG PATHWAY	ko00720	1	95	0.847372176	1	c25322_g1	http://www.genome.jp/kegg-bin/show_pathway?ko00720
Oocyte meiosis	KEGG PATHWAY	ko04114	2	175	0.859309663	1	c21163_g1, c21421_g1	http://www.genome.jp/kegg-bin/show_pathway?ko04114
Carbon metabolism	KEGG PATHWAY	ko01200	7	499	0.859339919	1	c25322_g1, c25710_g1, c22808_g1, c20317_g1, c23005_g1, c24608_g1, c22936_g1	http://www.genome.jp/kegg-bin/show_pathway?ko01200
Methane metabolism	KEGG PATHWAY	ko00680	1	100	0.861783529	1	c25710_g1	http://www.genome.jp/kegg-bin/show_pathway?ko00680
Glycerophospholipid metabolism	KEGG PATHWAY	ko00564	1	100	0.861783529	1	c26197_g1	http://www.genome.jp/kegg-bin/show_pathway?ko00564
Wnt signaling pathway	KEGG PATHWAY	ko04310	1	125	0.915854931	1	c20055_g1	http://www.genome.jp/kegg-bin/show_pathway?ko04310
RNA transport	KEGG PATHWAY	ko03013	3	283	0.917140679	1	c18353_g1, c11792_g1, c25889_g1	http://www.genome.jp/kegg-bin/show_pathway?ko03013
Propanoate metabolism	KEGG PATHWAY	ko00640	1	128	0.920723071	1	c21604_g1	http://www.genome.jp/kegg-bin/show_pathway?ko00640
Spliceosome	KEGG PATHWAY	ko03040	4	358	0.921985828	1	c25950_g1, c18353_g1, c16478_g1, c24684_g1	http://www.genome.jp/kegg-bin/show_pathway?ko03040
Cell cycle	KEGG PATHWAY	ko04110	1	136	0.932374647	1	c21163_g1	http://www.genome.jp/kegg-bin/show_pathway?ko04110
Ribosome	KEGG PATHWAY	ko03010	16	1180	0.955673714	1	c24688_g1, c22009_g1, c20180_g2, c23152_g1, c21364_g2, c22416_g4, c18044_g1, c18074_g1, c21721_g1, c18370_g1, c17117_g1, c22170_g3, c19993_g1, c21798_g1, c19311_g1, c17075_g1	http://www.genome.jp/kegg-bin/show_pathway?ko03010
Protein processing in endoplasmic reticulum	KEGG PATHWAY	ko04141	4	434	0.971867426	1	c25950_g1, c19609_g1, c16478_g1, c17017_g1	http://www.genome.jp/kegg-bin/show_pathway?ko04141
Starch and sucrose metabolism	KEGG PATHWAY	ko00500	1	183	0.973456613	1	c25050_g1	http://www.genome.jp/kegg-bin/show_pathway?ko00500
Ubiquitin mediated proteolysis	KEGG PATHWAY	ko04120	1	187	0.975489854	1	c19609_g1	http://www.genome.jp/kegg-bin/show_pathway?ko04120
--------------------
#Term	Database	Id	Sample number	Background number	P-Value	Corrected P-Value	Genes	Hyperlink
--------------------
